# Supplementary material for: Pharmacological and Pathological Effects of Mulberry Leaf Extract on the Treatment of Type 1 Diabetes Mellitus Mice
Source: MDPI journal article supplement (doi:10.3390/cimb45070343), 2023-06-29
Supplement: s1 [file s1]

## Supplementary Material

### Pharmacological and Pathological Effect of Mulberry Leaf Extract on the Treatment of Type 1 Diabetes Mellitus Mice

Liru Luo<sup>1,2</sup>, Wei Fan<sup>1,2</sup>, Jingping Qin<sup>2,3</sup>, Shiyin Guo<sup>1,2</sup>, Hang Xiao<sup>1,2</sup>, and Zhonghai Tang<sup>1,2,\*</sup>

\* Correspondence: Zhonghai Tang: tangzh@hunau.edu.cn

#### Supplementary Tables

Table S1. Statistical analysis of the effects of mulberry leaf aqueous extract on ALP in T1DM mice

| Group                                               | Mean deviation (I-J) | Standard error | Statistical Significance | 95% Confidence Interval of the Difference |          |
|-----------------------------------------------------|----------------------|----------------|--------------------------|-------------------------------------------|----------|
|                                                     |                      |                |                          | Lower                                     | Upper    |
| Treatment groups( High-dose, Middle-dose, Low-dose) | 82.8000***           | 16.94337       | .000                     | 48.8306                                   | 116.7694 |
|                                                     | 42.3000*             | 16.94337       | .016                     | 8.3306                                    | 76.2694  |
|                                                     | 50.4000**            | 16.94337       | .004                     | 16.4306                                   | 84.3694  |
| Metformin group                                     | 32.0000              | 16.94337       | .064                     | -1.9694                                   | 65.9694  |
| Control group                                       | 119.3260***          | 16.94337       | .000                     | 85.3566                                   | 153.2954 |

\* $P < 0.05$  , \*\* $P < 0.01$  , \*\*\*  $P < 0.001$  vs model group

Table S2. Statistical analysis of the effects of mulberry leaf aqueous extract on ALT in T1DM mice

| Group | Mean | Standard | Statistical | 95% Confidence Interval |
|-------|------|----------|-------------|-------------------------|
|-------|------|----------|-------------|-------------------------|

|                                                           | deviation<br>(I-J) | error    | Significance | of the Difference |          |
|-----------------------------------------------------------|--------------------|----------|--------------|-------------------|----------|
|                                                           |                    |          |              | Lower             | Upper    |
| Treatment<br>groups( High-dose,<br>Middle-dose, Low-dose) | 56.10000*          | 23.41061 | .021         | 8.9486            | 103.2514 |
|                                                           | 62.05556*          | 23.89335 | .013         | 13.9319           | 110.1792 |
|                                                           | 58.00000*          | 24.48340 | .022         | 8.6879            | 107.3121 |
| Metformin group                                           | 20.40000           | 23.41061 | .388         | -26.7514          | 67.5514  |
| Control group                                             | 80.25000*<br>*     | 24.48340 | .002         | 30.9379           | 129.5621 |

\* P<0.05, \*\* P<0.01vs model group(

Table S3. Statistical analysis of the effects of mulberry leaf aqueous extract on AST in T1DM mice

| Group                                                     | Mean deviation<br>(I-J) | Standard<br>error | Statistical<br>Significance | 95% Confidence Interval of<br>the Difference |          |
|-----------------------------------------------------------|-------------------------|-------------------|-----------------------------|----------------------------------------------|----------|
|                                                           |                         |                   |                             | Lower                                        | Upper    |
| Treatment<br>groups( High-dose,<br>Middle-dose, Low-dose) | 106.03333**             | 31.14303          | .001                        | 43.3080                                      | 168.7586 |
|                                                           | 89.33333**              | 31.78522          | .007                        | 25.3146                                      | 153.3521 |
|                                                           | 113.70833**             | 32.57016          | .001                        | 48.1087                                      | 179.3080 |
| Metformin group                                           | 69.83333*               | 31.14303          | .030                        | 7.1080                                       | 132.5586 |
| Control group                                             | 136.20833***            | 32.57016          | .000                        | 70.6087                                      | 201.8080 |

\*P<0.05, \*\* P<0.01, \*\*\* P<0.001vs model group

Table S4. Statistical analysis of the effects of mulberry leaf aqueous extract on BUN in T1DM mice

| Group                                                        | Mean deviation<br>(I-J) | Standard<br>error | Statistical<br>Significance | 95% Confidence Interval of<br>the Difference |         |
|--------------------------------------------------------------|-------------------------|-------------------|-----------------------------|----------------------------------------------|---------|
|                                                              |                         |                   |                             | Lower                                        | Upper   |
| Treatment<br>groups( High-dose,<br>Middle-dose,<br>Low-dose) | 9.30767**               | 2.89245           | .002                        | 3.4820                                       | 15.1334 |
|                                                              | 9.82944**               | 2.95209           | .002                        | 3.8836                                       | 15.7753 |
|                                                              | 12.98792***             | 3.02499           | .000                        | 6.8953                                       | 19.0806 |
| Metformin group                                              | 11.86167***             | 2.89245           | .000                        | 6.0360                                       | 17.6874 |
| Control group                                                | 16.82042***             | 3.02499           | .000                        | 10.7278                                      | 22.9131 |

\*P<0.05, \*\* P<0.01, \*\*\* P<0.001vs model group

Table S5. Statistical analysis of the effects of mulberry leaf aqueous extract on CHO in T1DM mice

| Group                                                         | Mean deviation<br>(I-J) | Standard<br>error | Statistical<br>Significance | 95% Confidence Interval of the<br>Difference |         |
|---------------------------------------------------------------|-------------------------|-------------------|-----------------------------|----------------------------------------------|---------|
|                                                               |                         |                   |                             | Lower                                        | Upper   |
| Treatment<br>groups( High-dose<br>, Middle-dose,<br>Low-dose) | 7.47867***              | 1.37165           | .000                        | 4.7160                                       | 10.2413 |
|                                                               | 7.50333***              | 1.39993           | .000                        | 4.6837                                       | 10.3229 |
|                                                               | 7.96917***              | 1.43451           | .000                        | 5.0799                                       | 10.8584 |
| Metformin group                                               | 7.76367***              | 1.37165           | .000                        | 5.0010                                       | 10.5263 |
| Control group                                                 | 8.13667***              | 1.43451           | .000                        | 5.2474                                       | 11.0259 |

\*P<0.05, \*\* P<0.01, \*\*\* P<0.001 vs model group

Table S6. Statistical analysis of the effects of mulberry leaf aqueous extract on LDH in T1DM mice

| Group                                               | Mean deviation (I-J) | Standard error | Statistical Significance | 95% Confidence Interval of the Difference |           |
|-----------------------------------------------------|----------------------|----------------|--------------------------|-------------------------------------------|-----------|
|                                                     |                      |                |                          | Lower                                     | Upper     |
| Treatment groups( High-dose, Middle-dose, Low-dose) | 854.96667***         | 204.45670      | .000                     | 443.1697                                  | 1266.7636 |
|                                                     | 685.61111**          | 208.67274      | .002                     | 265.3226                                  | 1105.8996 |
|                                                     | 987.16667***         | 213.82593      | .000                     | 556.4991                                  | 1417.8342 |
| Metformin group                                     | 783.56667***         | 204.45670      | .000                     | 371.7697                                  | 1195.3636 |
| Control group                                       | 683.54167**          | 213.82593      | .003                     | 252.8741                                  | 1114.2092 |

\*P<0.05, \*\* P<0.01, \*\*\* P<0.001 vs model group

Table S7. Statistical analysis of the effects of mulberry leaf aqueous extract on  $\beta$ -2-GM in T1DM mice

| Group                                               | Mean deviation (I-J) | Standard error | Statistical Significance | 95% Confidence Interval of the Difference |           |
|-----------------------------------------------------|----------------------|----------------|--------------------------|-------------------------------------------|-----------|
|                                                     |                      |                |                          | Lower                                     | Upper     |
| Treatment groups( High-dose, Middle-dose, Low-dose) | 40.6103433***        | 6.1976219      | .000                     | 27.915090                                 | 53.305596 |
|                                                     | 43.2125933***        | 6.1976219      | .000                     | 30.517340                                 | 55.907846 |
|                                                     | 42.8663600***        | 6.1976219      | .000                     | 30.171107                                 | 55.561613 |

|                                               |               |           |      |           |           |
|-----------------------------------------------|---------------|-----------|------|-----------|-----------|
| Metformin group                               | 41.4746100*** | 6.1976219 | .000 | 28.779357 | 54.169863 |
| Control group                                 | 36.5227800*** | 6.4732050 | .000 | 23.263021 | 49.782539 |
| *P<0.05, ** P<0.01, *** P<0.001vs model group |               |           |      |           |           |

Table S8. The biochemical parameters observed in all groups of mice ( $\bar{x} \pm s$ )

| Group                 |     | Treatment groups |               |               | Metformin group | Model group    | Control group  |
|-----------------------|-----|------------------|---------------|---------------|-----------------|----------------|----------------|
|                       |     | High-dose        | Middle-dose   | Low-dose      |                 |                |                |
| Fasting blood glucose | 0d  | 24.20±3.80       | 25.90±3.40    | 24.00±5.70    | 25.10±3.40      | 24.70±5.50     | 6.10±0.90      |
|                       | 10d | 21.50±2.40       | 23.40±5.90    | 21.70±3.00    | 20.30±1.80      | 25.60±3.50     | 6.10±0.90      |
|                       | 20d | 19.50±4.30       | 21.30±5.80    | 20.90±4.90    | 17.60±1.60      | 25.10±7.00     | 5.50±0.90      |
|                       | 30d | 17.10±3.60       | 21.20±3.50    | 20.70±3.40    | 14.30±2.10      | 25.30±4.40     | 5.80±0.80      |
|                       | 40d | 15.20±2.20       | 18.10±3.00    | 18.60±3.30    | 12.60±1.80      | 26.20±3.20     | 5.80±1.10      |
| Blood glucose(AUC)    |     | 52.40±4.50       | 53.60±4.10    | 54.70±3.40    | 45.90±4.70      | 57.90±2.40     | 18.80±4.00     |
| HDL-C                 |     | 3.02±0.67        | 2.75±0.55     | 2.75±0.32     | 3.32±0.78       | 2.14±0.36      | 3.31±0.54      |
| LDL-C                 |     | 0.41±0.06        | 0.42±0.05     | 0.44±0.10     | 0.41±0.05       | 0.50±0.13      | 0.21±0.03      |
| TG                    |     | 1.85±0.50        | 2.05±0.53     | 2.09±0.36     | 1.74±0.38       | 2.41±0.64      | 1.06±0.32      |
| Ins                   |     | 2.94±0.24        | 2.89 ±0.31    | 2.65±0.27     | 2.00±0.31       | 1.67±0.69      | 3.96 ±0.50     |
| ALP                   |     | 101.40±6.57      | 141.90±12.51  | 133.80±12.03  | 152.20±13.08    | 184.20±16.82   | 64.87±7.92     |
| ALT                   |     | 72.40±6.79       | 66.44±9.20    | 70.50±6.29    | 108.10±17.28    | 128.50±41.80   | 48.25±3.59     |
| AST                   |     | 123.30±13.41     | 140.00±11.53  | 115.63±8.93   | 159.50±26.09    | 229.33±47.26   | 93.13±9.59     |
| BUN                   |     | 14.65±1.81       | 14.13±1.80    | 10.97±1.24    | 12.10±1.64      | 23.96±4.27     | 7.14±0.33      |
| CHO                   |     | 3.46±0.19        | 3.43±0.26     | 2.97±0.13     | 3.17±0.29       | 10.94±3.16     | 2.80±0.11      |
| LDH                   |     | 1190.20±93.96    | 1359.56±93.02 | 1058.00±70.63 | 1261.60±63.11   | 2045.17±28.027 | 1361.63±21.722 |
| β-2-GM                |     | 25.03±2.35       | 22.43±1.05    | 22.78±2.46    | 24.17±1.17      | 65.65±10.61    | 29.12±3.61     |
