# Supplementary material for: Pharmacological and Pathological Effects of Mulberry Leaf Extract on the Treatment of Type 1 Diabetes Mellitus Mice
Source: MDPI journal article supplement (doi:10.3390/cimb45070343), 2023-06-29
Supplement: s1 [file s1]

## Supplementary Material(Raw Data)

### Pharmacological and Pathological Effect of Mulberry Leaf Extract on the Treatment of Type 1 Diabetes Mellitus Mice

Liru Luo <sup>1,2</sup>, Wei Fan<sup>1,2</sup>, Jingping Qin<sup>2,3</sup>, Shiyin Guo<sup>1,2</sup>, Hang Xiao<sup>1,2</sup>, and Zhonghai Tang <sup>1,2,\*</sup>

\* **Correspondence:** Zhonghai Tang: tangzh@hunau.edu.cn

#### Raw Data

Figure 1 raw data : Hypoglycemic effect of the aqueous mulberry leaf extract on T1DM mice (x±s)

| Group                                               | Dose (mg·kg <sup>-1</sup> ) | N  | Fasting blood glucose (mmol·L <sup>-1</sup> ) |            |            |            |            |
|-----------------------------------------------------|-----------------------------|----|-----------------------------------------------|------------|------------|------------|------------|
|                                                     |                             |    | 0d                                            | 10d        | 20d        | 30d        | 40d        |
| Control group                                       |                             | 20 | 6.1±0.9**                                     | 6.1±0.9**  | 5.5±0.9**  | 5.8±0.8**  | 5.8±1.1**  |
| Model group                                         |                             | 20 | 24.7±5.5                                      | 25.6±3.5   | 25.1±7.0   | 25.3±4.4   | 26.2±3.2   |
| Metformin group                                     | 270                         | 20 | 25.1±3.4                                      | 20.3±1.8** | 17.6±1.6** | 14.3±2.1** | 12.6±1.8** |
| Treatment groups( High-dose, Middle-dose, Low-dose) | 1200                        | 20 | 24.2±3.8                                      | 21.5±2.4*  | 19.5±4.3*  | 17.1±3.6** | 15.2±2.2** |
|                                                     | 600                         | 20 | 25.9±3.4                                      | 23.4±5.9   | 21.3±5.8   | 21.2±3.5*  | 18.1±3.0** |
|                                                     | 300                         | 20 | 24.0±5.7                                      | 21.7±3.0*  | 20.9±4.9   | 20.7±3.4** | 18.6±3.3** |

\* $P < 0.05$  , \*\* $P < 0.01$  vs model group

Figure 2 raw data: Effect of the aqueous mulberry aqueous leaf extract on serum lipids (HDL-C, LDL-C, and TG) and serum insulin levels in T1DM mice.(x±s)

| Group           | Dose(mg·kg <sup>-1</sup> ) | N=20 | HDL-C (mmol·L <sup>-1</sup> ) | LDL-C (mmol·L <sup>-1</sup> ) | TG (mmol·L <sup>-1</sup> ) | Ins (mIU·L <sup>-1</sup> ) |
|-----------------|----------------------------|------|-------------------------------|-------------------------------|----------------------------|----------------------------|
| Control group   |                            | 20   | 3.31±0.54**                   | 0.21±0.03**                   | 1.06±0.32**                | 3.96 ±0.50**               |
| Model group     |                            | 20   | 2.14±0.36                     | 0.50±0.13                     | 2.41±0.64                  | 1.67±0.69                  |
| Metformin group | 270                        | 20   | 3.32±0.78**                   | 0.41±0.05*                    | 1.74±0.38**                | 2.00±0.31                  |

| Treatment              |      |    |             |            |            |              |
|------------------------|------|----|-------------|------------|------------|--------------|
| groups( High-dose,     | 1200 | 20 | 3.02±0.67** | 0.41±0.06* | 1.85±0.50* | 2.94±0.24**  |
|                        | 600  | 20 | 2.75±0.55*  | 0.42±0.05  | 2.05±0.53  | 2.89 ±0.31** |
| Middle-dose, Low-dose) | 300  | 20 | 2.75±0.32*  | 0.44±0.10  | 2.09±0.36  | 2.65±0.27**  |

\* $P < 0.05$  ; \*\* $P < 0.01$  vs model group

Figure 3 raw data: The effects of the aqueous mulberry leaf extract on ALP in T1DM mice ( $\bar{x} \pm s$ )

| Group                                               | N   | Mean     | Mean deviation | Standard error | 95% Confidence Interval of the Difference |          | minimum | maximum |
|-----------------------------------------------------|-----|----------|----------------|----------------|-------------------------------------------|----------|---------|---------|
|                                                     |     |          |                |                |                                           |          |         |         |
|                                                     |     |          |                |                | Lower                                     | Upper    |         |         |
| Treatment groups( High-dose, Middle-dose, Low-dose) | 20  | 101.4000 | 20.76964       | 6.56794        | 86.5423                                   | 116.2577 | 65.00   | 134.00  |
|                                                     | 20  | 141.9000 | 39.55432       | 12.50818       | 113.6045                                  | 170.1955 | 85.00   | 201.00  |
|                                                     | 20  | 133.8000 | 38.04325       | 12.03033       | 106.5855                                  | 161.0145 | 67.00   | 179.00  |
| Metformin group                                     | 20  | 152.2000 | 41.36504       | 13.08077       | 122.6092                                  | 181.7908 | 84.00   | 198.00  |
| Model group                                         | 20  | 184.2000 | 53.20150       | 16.82379       | 146.1419                                  | 222.2581 | 150.00  | 314.00  |
| Control group                                       | 20  | 64.8740  | 25.05300       | 7.92245        | 46.9522                                   | 82.7958  | 12.00   | 103.00  |
| Total                                               | 120 | 129.7290 | 52.71693       | 6.80573        | 116.1108                                  | 143.3472 | 12.00   | 314.00  |

Figure 4 raw data: The effects of the aqueous mulberry leaf extract on ALT in T1DM mice

| Group                                               | N   | Mean     | Mean deviation | Standard error | 95% Confidence Interval of the Difference |          | minimum | maximum |
|-----------------------------------------------------|-----|----------|----------------|----------------|-------------------------------------------|----------|---------|---------|
|                                                     |     |          |                |                | Lower                                     | Upper    |         |         |
| Treatment groups( High-dose, Middle-dose, Low-dose) | 20  | 72.4000  | 21.47971       | 6.79248        | 57.0343                                   | 87.7657  | 52.00   | 118.00  |
|                                                     | 20  | 66.4444  | 27.61391       | 9.20464        | 45.2185                                   | 87.6704  | 6.00    | 95.00   |
|                                                     | 20  | 70.5000  | 17.80048       | 6.29342        | 55.6184                                   | 85.3816  | 50.00   | 99.00   |
| Metformin group                                     | 20  | 108.1000 | 54.65742       | 17.28419       | 69.0004                                   | 147.1996 | 45.00   | 182.00  |
| Model group                                         | 20  | 128.5000 | 102.37724      | 41.79533       | 21.0617                                   | 235.9383 | 58.00   | 335.00  |
| Control group                                       | 20  | 48.2500  | 10.15241       | 3.58942        | 39.7624                                   | 56.7376  | 35.00   | 66.00   |
| Total                                               | 120 | 80.8627  | 50.09472       | 7.01466        | 66.7734                                   | 94.9521  | 6.00    | 335.00  |

Figure 5 raw data: The effects of the aqueous mulberry leaf extract on AST in T1DM mice

| Group                                               | N   | Mean     | Mean deviation | Standard error | 95% Confidence Interval of the Difference |          | minimum | maximum |
|-----------------------------------------------------|-----|----------|----------------|----------------|-------------------------------------------|----------|---------|---------|
|                                                     |     |          |                |                | Lower                                     | Upper    |         |         |
| Treatment groups( High-dose, Middle-dose, Low-dose) | 20  | 123.3000 | 42.40820       | 13.41065       | 92.9630                                   | 153.6370 | 83.00   | 202.00  |
|                                                     | 20  | 140.0000 | 34.59407       | 11.53136       | 113.4086                                  | 166.5914 | 93.00   | 206.00  |
|                                                     | 20  | 115.6250 | 25.26962       | 8.93416        | 94.4991                                   | 136.7509 | 80.00   | 158.00  |
| Metformin group                                     | 20  | 159.5000 | 82.51902       | 26.09481       | 100.4694                                  | 218.5306 | 79.00   | 307.00  |
| Model group                                         | 20  | 229.3333 | 115.76298      | 47.26004       | 107.8475                                  | 350.8191 | 103.00  | 443.00  |
| Control group                                       | 20  | 93.1250  | 27.12109       | 9.58875        | 70.4512                                   | 115.7988 | 62.00   | 133.00  |
| Total                                               | 120 | 139.8824 | 69.35031       | 9.71099        | 120.3773                                  | 159.3874 | 62.00   | 443.00  |

Figure 6 raw data: The effects of the aqueous mulberry leaf extract on BUN in T1DM mice

| Group                                     | N  | Mean    | Mean deviation | Standard error | 95% Confidence Interval of the Difference |         | minimum | maximum |
|-------------------------------------------|----|---------|----------------|----------------|-------------------------------------------|---------|---------|---------|
|                                           |    |         |                |                | Lower                                     | Upper   |         |         |
| Treatment groups( High-dose, Middle-dose, | 20 | 14.6540 | 5.73807        | 1.81454        | 10.5492                                   | 18.7588 | 9.47    | 27.24   |
|                                           | 20 | 14.1322 | 5.41062        | 1.80354        | 9.9733                                    | 18.2912 | 8.90    | 27.54   |

|                 |     |         |          |         |         |         |       |       |
|-----------------|-----|---------|----------|---------|---------|---------|-------|-------|
| Low-dose)       | 20  | 10.9737 | 3.50236  | 1.23827 | 8.0457  | 13.9018 | 8.80  | 19.48 |
| Metformin group | 20  | 12.1000 | 5.19927  | 1.64415 | 8.3807  | 15.8193 | 8.40  | 24.88 |
| Model group     | 20  | 23.9617 | 10.45127 | 4.26671 | 12.9937 | 34.9296 | 11.05 | 36.56 |
| Control group   | 20  | 7.1413  | .92370   | .32658  | 6.3690  | 7.9135  | 6.10  | 8.86  |
| Total           | 120 | 13.4004 | 7.04133  | .98598  | 11.4200 | 15.3808 | 6.10  | 36.56 |

Figure 7 raw data: The effects of the aqueous mulberry leaf extract on CHO in T1DM mice

| Group                                               | N   | Mean    | Mean deviation | Standard error | 95% Confidence Interval of the Difference |         | minimum | maximum |
|-----------------------------------------------------|-----|---------|----------------|----------------|-------------------------------------------|---------|---------|---------|
|                                                     |     |         |                |                |                                           |         |         |         |
|                                                     |     |         |                |                | Lower                                     | Upper   |         |         |
| Treatment groups( High-dose, Middle-dose, Low-dose) | 20  | 3.4580  | .60835         | .19238         | 3.0228                                    | 3.8932  | 2.56    | 4.22    |
|                                                     | 20  | 3.4333  | .78626         | .26209         | 2.8290                                    | 4.0377  | 2.40    | 4.67    |
|                                                     | 20  | 2.9675  | .36636         | .12953         | 2.6612                                    | 3.2738  | 2.49    | 3.43    |
| Metformin group                                     | 20  | 3.1730  | .92535         | .29262         | 2.5110                                    | 3.8350  | 2.06    | 4.93    |
| Model group                                         | 20  | 10.9367 | 7.74456        | 3.16170        | 2.8093                                    | 19.0641 | 3.09    | 23.72   |
| Control group                                       | 20  | 2.8000  | .31108         | .10998         | 2.5399                                    | 3.0601  | 2.38    | 3.36    |
| Total                                               | 120 | 4.0975  | 3.57331        | .50036         | 3.0924                                    | 5.1025  | 2.06    | 23.72   |

Figure 8 raw data: The effects of the aqueous mulberry leaf extract on LDH in T1DM mice

| Group | N | Mean | Mean | Standard | 95% Confidence Interval | minim | maximu |
|-------|---|------|------|----------|-------------------------|-------|--------|
|-------|---|------|------|----------|-------------------------|-------|--------|

|                       |     | deviation |           | error     | of the Difference |           | um      | m       |
|-----------------------|-----|-----------|-----------|-----------|-------------------|-----------|---------|---------|
|                       |     |           |           |           | Lower             | Upper     |         |         |
| Treatment groups( Hig | 20  | 1190.2000 | 297.13214 | 93.96143  | 977.6445          | 1402.7555 | 761.00  | 1666.00 |
| h-dose,               | 20  | 1359.5556 | 279.05246 | 93.01749  | 1145.0568         | 1574.0543 | 862.00  | 1761.00 |
| Middle-dose           |     |           |           |           |                   |           |         |         |
| , Low-dose)           | 20  | 1058.0000 | 199.77988 | 70.63285  | 890.9798          | 1225.0202 | 698.00  | 1335.00 |
| Metformin group       | 20  | 1261.6000 | 199.56185 | 63.10700  | 1118.8421         | 1404.3579 | 962.00  | 1528.00 |
| Model group           | 20  | 2045.1667 | 686.52412 | 280.27230 | 1324.7038         | 2765.6295 | 1204.00 | 2907.00 |
| Control group         | 20  | 1361.6250 | 614.38051 | 217.21631 | 847.9900          | 1875.2600 | 895.00  | 2800.00 |
| Total                 | 120 | 1340.8235 | 468.33632 | 65.58020  | 1209.1018         | 1472.5452 | 698.00  | 2907.00 |

Figure 9 raw data: The effects of the aqueous mulberry leaf extract on  $\beta$ -2-GM in T1DM mice

| Group                  | N  | Mean      | Mean deviation | Standard error | 95% Confidence Interval |           | minimum | maximum |
|------------------------|----|-----------|----------------|----------------|-------------------------|-----------|---------|---------|
|                        |    |           |                |                | of the Difference       |           |         |         |
|                        |    |           |                |                | Lower                   | Upper     |         |         |
| Treatment groups( High | 20 | 25.034117 | 5.7495592      | 2.3472477      | 19.000324               | 31.067909 | 19.9338 | 34.5004 |
| -dose,                 | 20 | 22.431867 | 2.5773947      | 1.0522170      | 19.727057               | 25.136677 | 19.1547 | 26.7910 |
| Middle-dose,           |    |           |                |                |                         |           |         |         |
| Low-dose)              | 20 | 22.778100 | 6.0248171      | 2.4596213      | 16.455442               | 29.100758 | 18.6272 | 34.7519 |
| Metformin group        | 20 | 24.169850 | 2.8596068      | 1.1674296      | 21.168877               | 27.170823 | 20.1367 | 28.1787 |

---

|                  |     |           |            |            |           |           |         |         |
|------------------|-----|-----------|------------|------------|-----------|-----------|---------|---------|
| Model group      | 20  | 65.644460 | 23.7278046 | 10.6113968 | 36.182499 | 95.106421 | 25.5494 | 87.1828 |
| Control<br>group | 20  | 29.121680 | 8.0661501  | 3.6072920  | 19.106232 | 39.137128 | 18.2540 | 35.8393 |
| Total            | 120 | 30.597479 | 17.6549616 | 3.0278009  | 24.437372 | 36.757587 | 18.2540 | 87.1828 |

---
